# Supplementary material
Source: publisher site journal article supplement (https://www.dovepress.com/article/603361)
Supplement: Supplementary file 1 [file 603361%20Revised%20Supplementary%20Materials.pdf]

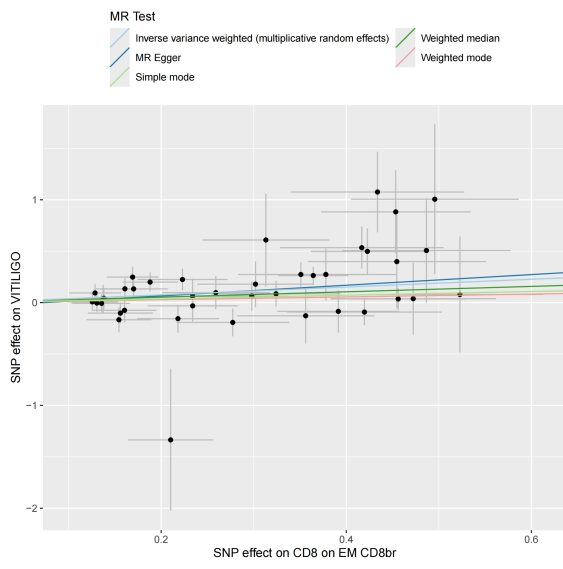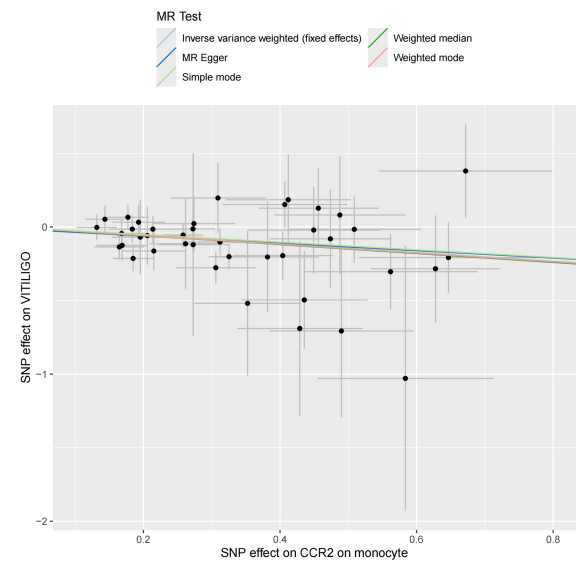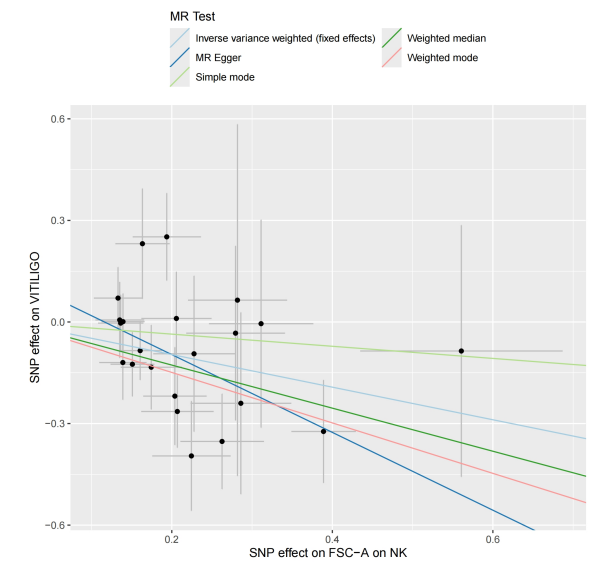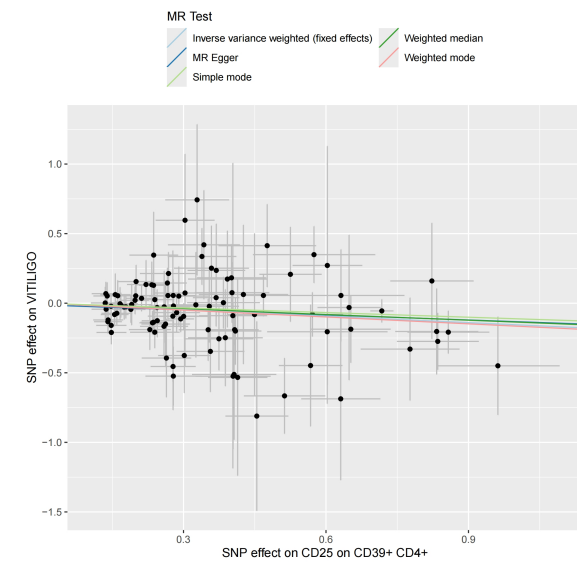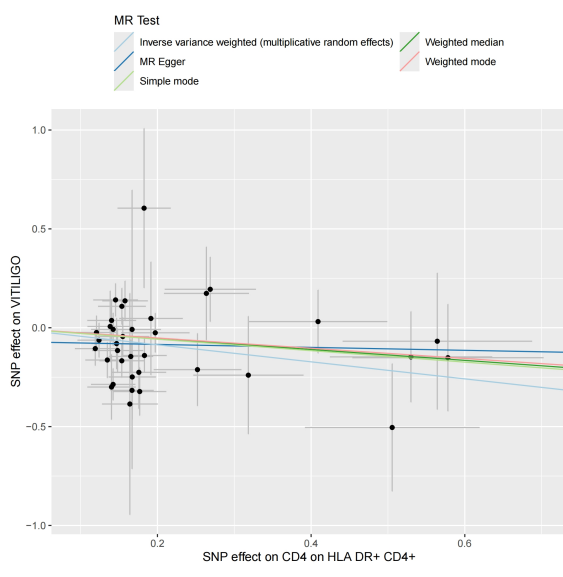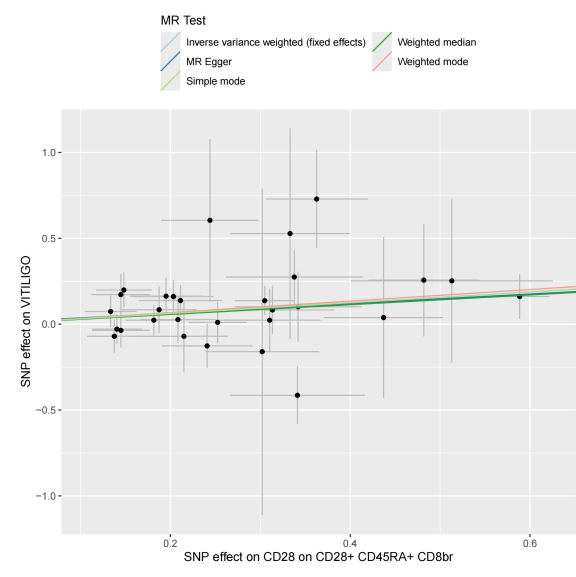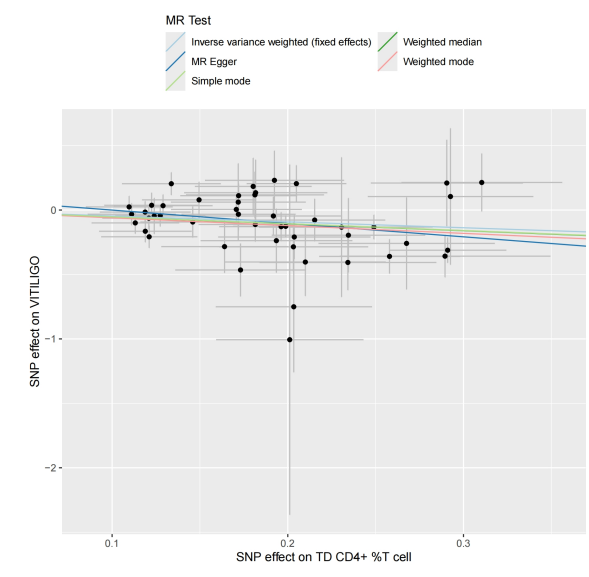

**Supplementary Figure 1. Scatter plots of SNP-specific causal estimates for each exposure.** Each scatter plot presents the effect of each genetic instrument on the exposure (x-axis) against its effect on vitiligo (y-axis), with error bars representing 95% confidence intervals. The slope of the fitted line corresponds to the MR estimate (IVW method).

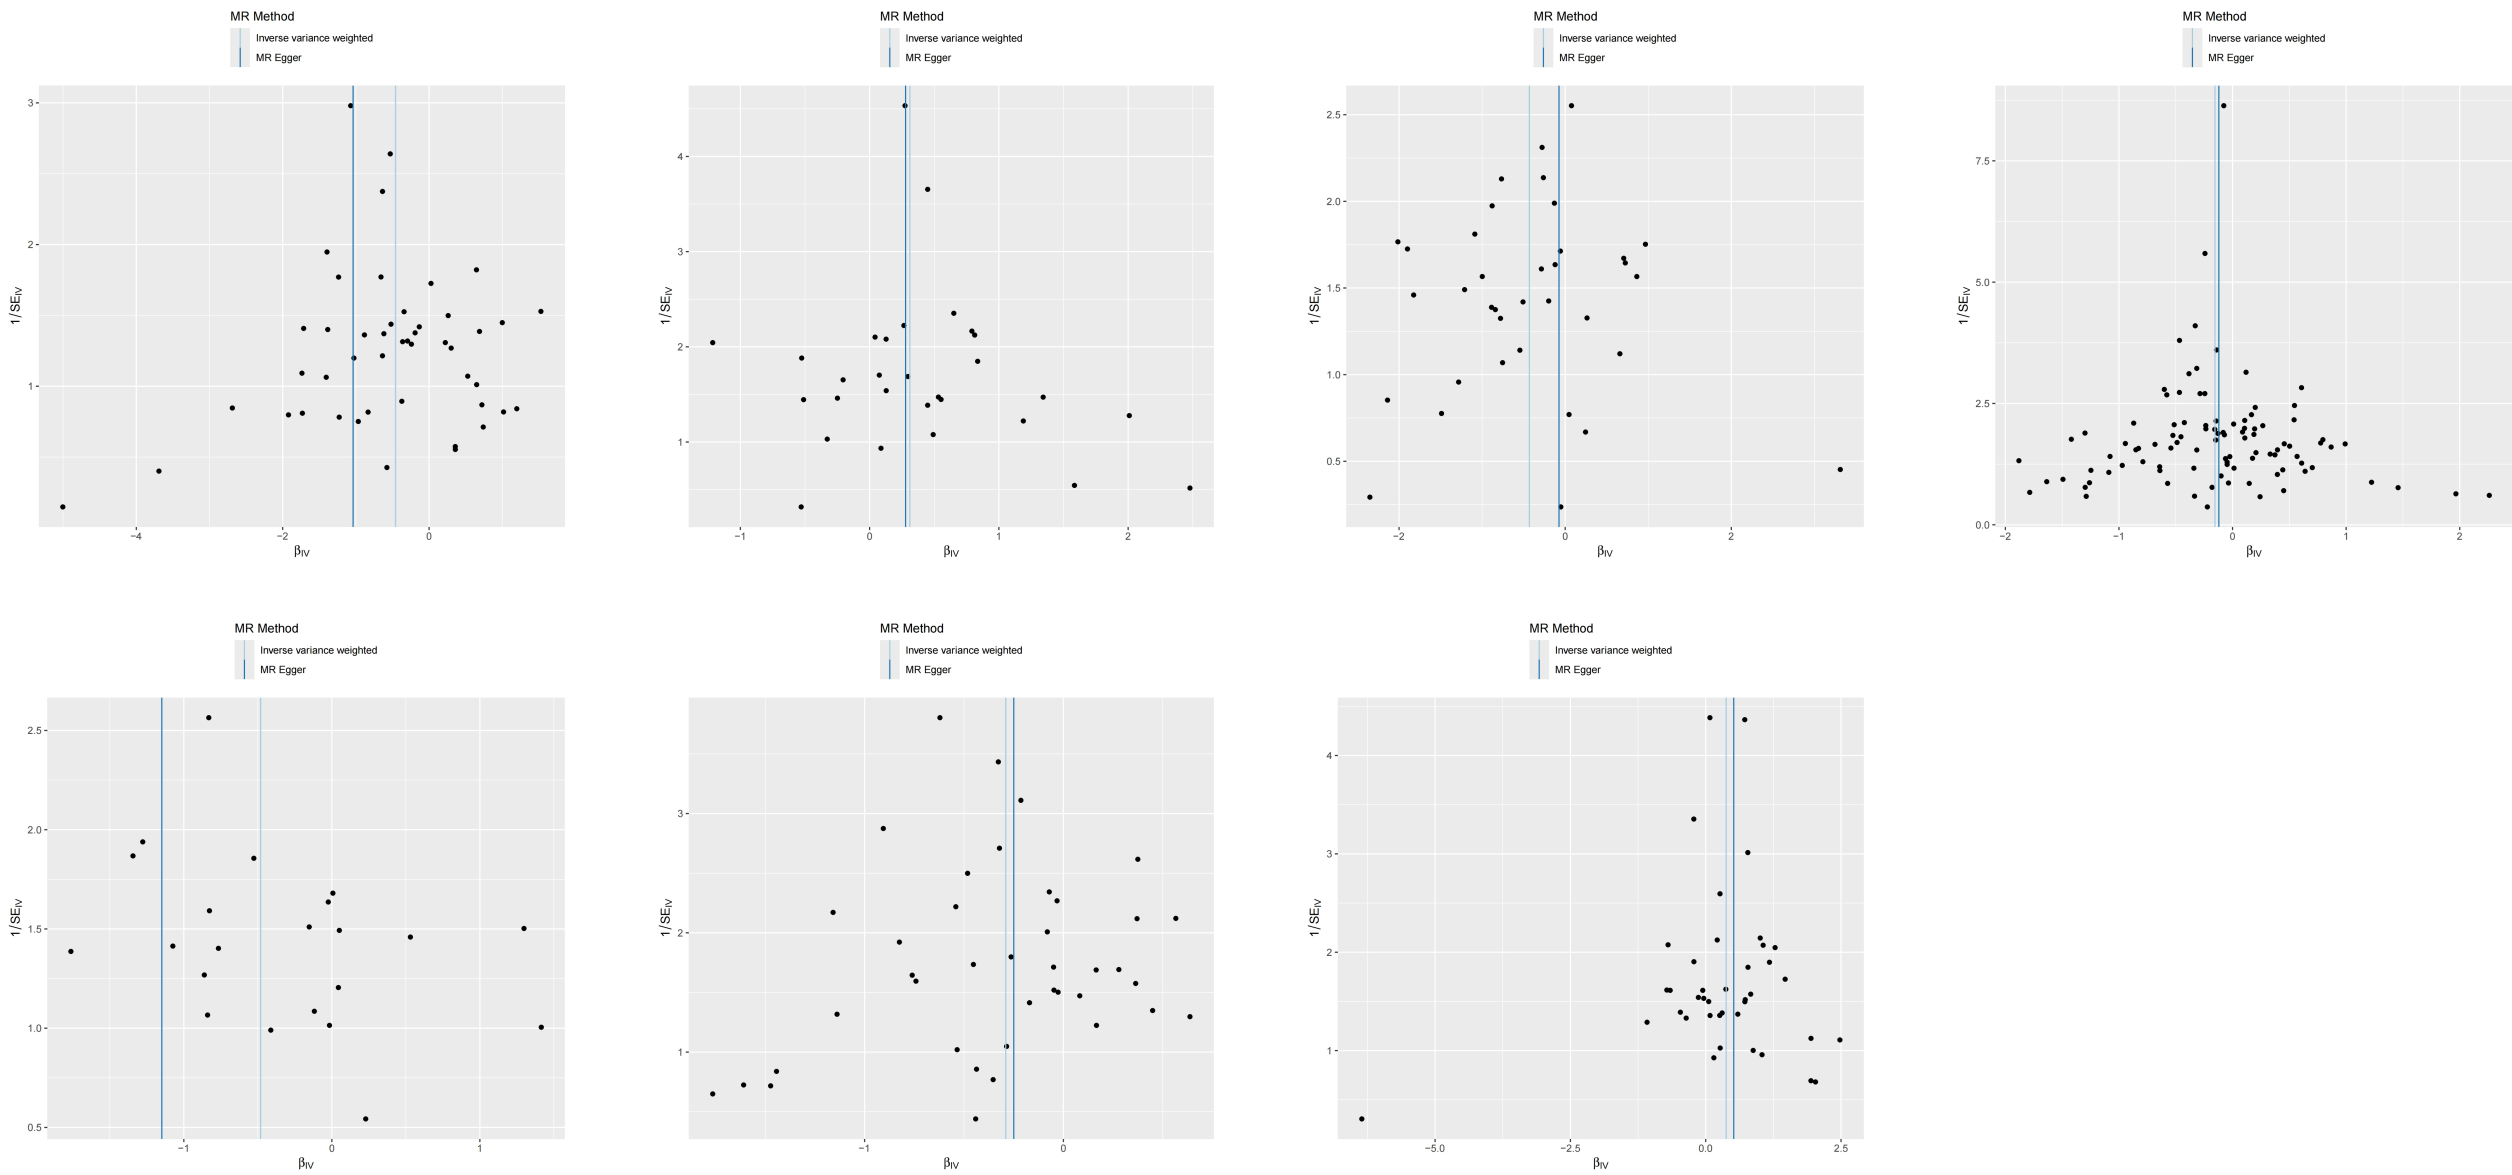

**Supplementary Figure 2. Funnel plots for the forward MR analysis.**

Each funnel plot shows the distribution of single-SNP causal estimates (x-axis:  $\beta_{IV}$  for each SNP) against their precision (y-axis:  $1/SE_{IV}$ ). Symmetrical distribution around the IVW estimate suggests absence of directional pleiotropy. Plots are shown for the one significant exposure (TD CD4<sup>+</sup> %T cell) and six suggestive exposures (CD8 on EM CD8br, CCR2 on monocyte, FSC-A on NK, CD28 on CD28<sup>+</sup> CD45RA<sup>+</sup> CD8br, CD4 on HLA DR<sup>+</sup> CD4<sup>+</sup>, CD25 on CD39<sup>+</sup> CD4<sup>+</sup>).

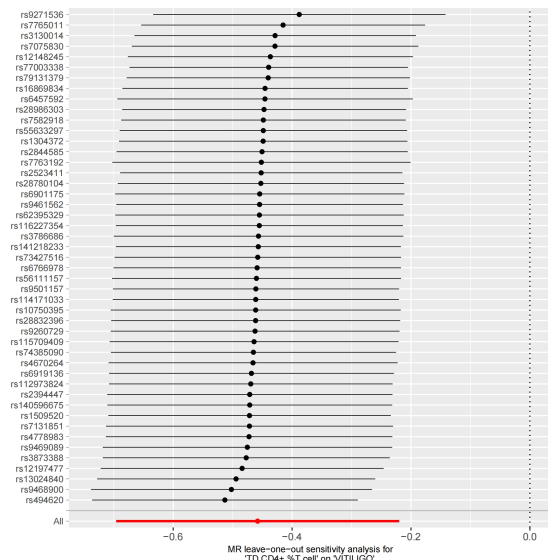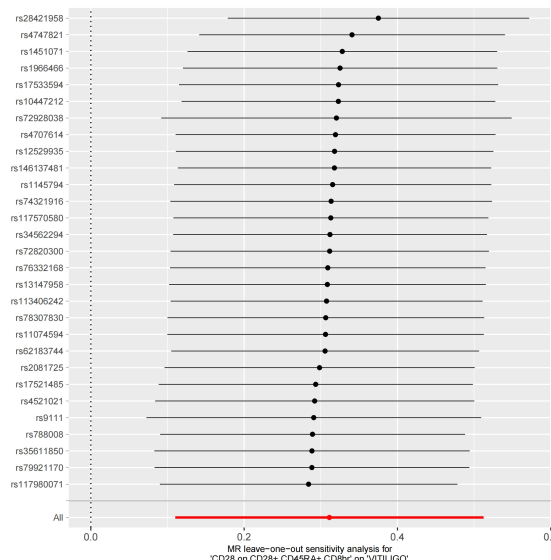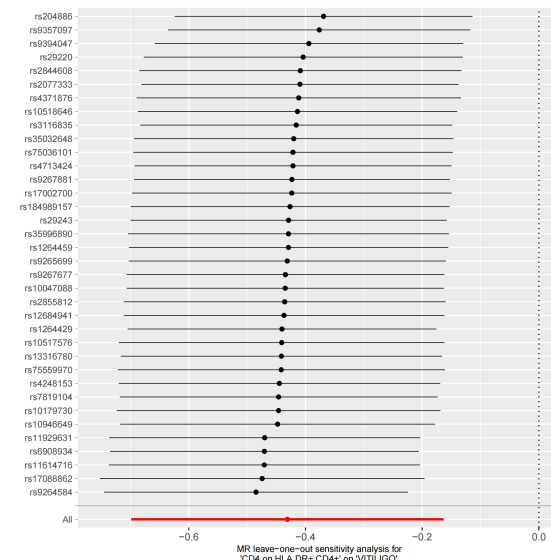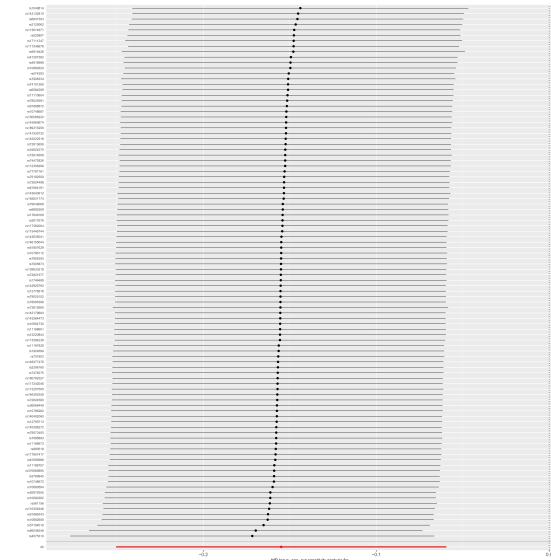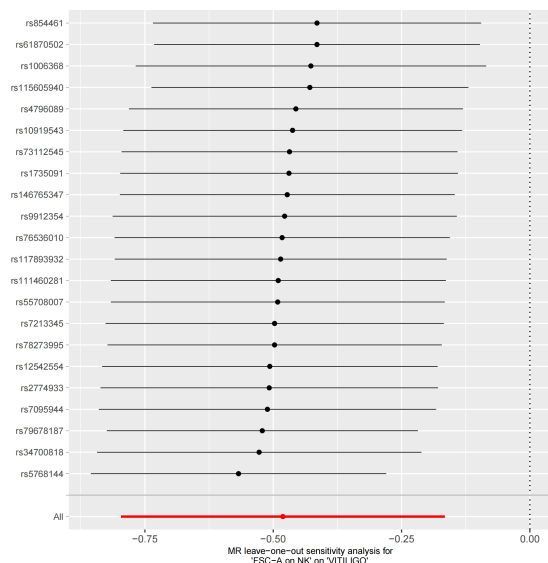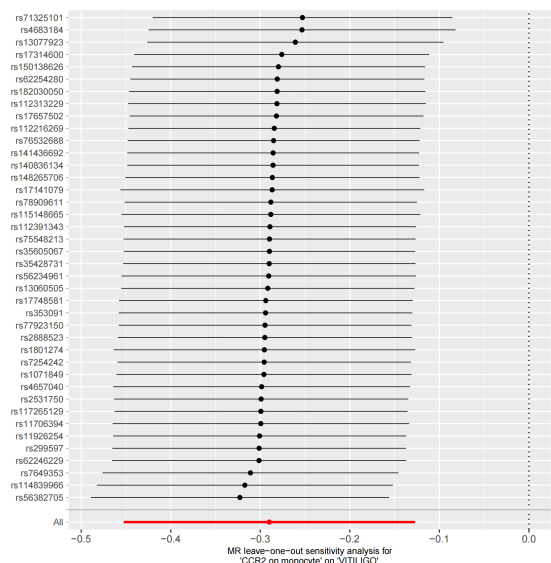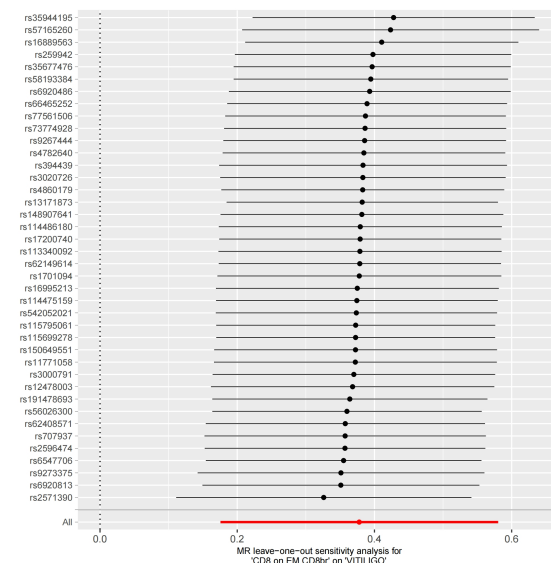

**Supplementary Figure 3 . Leave-one-out sensitivity analysis for the causal effect of immune cell phenotypes on vitiligo risk.** Each plot shows the change in causal estimate (OR) for vitiligo risk after removing each single SNP one at a time. The red dotted line indicates the overall IVW estimate using all SNPs. No single SNP disproportionately altered the overall estimate, confirming robustness. Results are shown for the seven exposures with PFDR < 0.20.

**Supplementary Table 1. Sensitivity analyses for forward MR: causal effects of immunophenotypes on vitiligo risk (including outlier detection).**

| id.exposure | id.outcome | outcome  | exposure                                            | nsnp | b_MR.Egger   | se_MR.Egger | pval_MR.Egger | estimate_MR.Egger | b_Weighted.median |
|-------------|------------|----------|-----------------------------------------------------|------|--------------|-------------|---------------|-------------------|-------------------|
| TDV3oU      | Ic5wdw     | VITILIGO | TD CD4 <sup>+</sup> %T cell                         | 47   | -1.038017246 | 0.387606153 | 0.010301714   | 0.35 (0.17-0.76)  | -0.534326046      |
| FluSGP      | vPenMO     | VITILIGO | CD8 on EM CD8br                                     | 40   | 0.51761663   | 0.244824877 | 0.041114053   | 1.68 (1.04-2.71)  | 0.26209184        |
| If6nSf      | JhF9NT     | VITILIGO | CCR2 on monocyte                                    | 40   | -0.249612943 | 0.209219353 | 0.240238836   | 0.78 (0.52-1.17)  | -0.301280619      |
| wZTn6E      | JWYTTL     | VITILIGO | FSC-A on NK                                         | 22   | -1.148923512 | 0.473672707 | 0.024871059   | 0.32 (0.13-0.80)  | -0.636275839      |
| zFDXMQ      | biamAc     | VITILIGO | CD25 on CD39 <sup>+</sup> CD4 <sup>+</sup>          | 98   | -0.120739867 | 0.094362675 | 0.203794306   | 0.89 (0.74-1.07)  | -0.135545962      |
| dFLMC2      | razIuj     | VITILIGO | CD28 on CD28 <sup>+</sup> CD45RA <sup>+</sup> CD8br | 29   | 0.278020788  | 0.256409354 | 0.287826041   | 1.32 (0.80-2.18)  | 0.283497881       |
| rYKnET      | Em901J     | VITILIGO | CD4 on HLA DR <sup>+</sup> CD4 <sup>+</sup>         | 36   | -0.074309395 | 0.355444155 | 0.83564841    | 0.93 (0.46-1.86)  | -0.274946285      |

| se_Weighted.median | pval_Weighted.median | estimate_Weighted.median | b_Inverse.variance.weighted. | se_Inverse.variance.weighted. |
|--------------------|----------------------|--------------------------|------------------------------|-------------------------------|
| 0.172789963        | 0.001985824          | 0.59 (0.42-0.82)         | -0.458049508                 | 0.107458913                   |
| 0.142488153        | 0.065857269          | 1.30 (0.98-1.72)         | 0.377806389                  | 0.103151549                   |
| 0.123158053        | 0.014433386          | 0.74 (0.58-0.94)         | -0.289956399                 | 0.082895737                   |
| 0.214952434        | 0.003075618          | 0.53 (0.35-0.81)         | -0.481278927                 | 0.143192423                   |
| 0.078258512        | 0.083268514          | 0.87 (0.75-1.02)         | -0.154943401                 | 0.048701269                   |
| 0.146409623        | 0.052826848          | 1.33 (1.00-1.77)         | 0.311162947                  | 0.098163836                   |
| 0.171743534        | 0.109396411          | 0.76 (0.54-1.06)         | -0.431029814                 | 0.136468104                   |

| pval_Inverse.variance.weighted. | fdr_Inverse.variance.weighted. | estimate_Inverse.variance.weighted. | b_Weighted.mode | se_Weighted.mode | pval_Weighted.mode |
|---------------------------------|--------------------------------|-------------------------------------|-----------------|------------------|--------------------|
| 0.0000202                       | 0.01477372                     | 0.63 (0.51-0.78)                    | -0.603246029    | 0.238785364      | 0.015032052        |
| 0.000249635                     | 0.091241569                    | 1.46 (1.19-1.79)                    | 0.137517958     | 0.210032681      | 0.516474796        |
| 0.000469034                     | 0.114288064                    | 0.75 (0.64-0.88)                    | -0.296007362    | 0.183761242      | 0.115282822        |
| 0.000776428                     | 0.14189217                     | 0.62 (0.47-0.82)                    | -0.745196045    | 0.328280712      | 0.033859243        |
| 0.001465113                     | 0.165625823                    | 0.86 (0.78-0.94)                    | -0.164822255    | 0.083272862      | 0.050616556        |
| 0.001525267                     | 0.165625823                    | 1.37 (1.13-1.65)                    | 0.336032137     | 0.149823378      | 0.03300458         |
| 0.00158602                      | 0.165625823                    | 0.65 (0.50-0.85)                    | -0.259235128    | 0.267243075      | 0.338685232        |

| estimate_Weighted.mode | b_Simple.mode | se_Simple.mode | pval_Simple.mode | estimate_Simple.mode | correct_causal_direction | steiger_pval | Value_Power  |
|------------------------|---------------|----------------|------------------|----------------------|--------------------------|--------------|--------------|
| 0.55 (0.34-0.87)       | -0.529448328  | 0.361490508    | 0.149824518      | 0.59 (0.29-1.20)     | TRUE                     | 0            | 233766.9834  |
| 1.15 (0.76-1.73)       | 0.179642972   | 0.313409736    | 0.569807318      | 1.20 (0.65-2.21)     | TRUE                     | 0            | 236959.8015  |
| 0.74 (0.52-1.07)       | -0.259334947  | 0.229331151    | 0.265032262      | 0.77 (0.49-1.21)     | TRUE                     | 0            | 275702.6671  |
| 0.47 (0.25-0.90)       | -0.179344491  | 0.395426036    | 0.6548066        | 0.84 (0.39-1.81)     | TRUE                     | 4.06E-138    | 87607.26532  |
| 0.85 (0.72-1.00)       | -0.111911325  | 0.141696078    | 0.43157203       | 0.89 (0.68-1.18)     | TRUE                     | NA           | -1121475.863 |
| 1.40 (1.04-1.88)       | 0.313681814   | 0.240056341    | 0.201945615      | 1.37 (0.85-2.19)     | TRUE                     | 0            | 229857.6837  |
| 0.77 (0.46-1.30)       | -0.289743777  | 0.325590304    | 0.379594222      | 0.75 (0.40-1.42)     | TRUE                     | 4.14E-217    | 147381.0795  |

| F        | R2       | Q_Inverse.variance.weighted | Q_df_Inverse.variance.weighted | Q_pval_Inverse.variance.weighted | egger_intercept | se       | pval       |
|----------|----------|-----------------------------|--------------------------------|----------------------------------|-----------------|----------|------------|
| 27.75605 | 0.377305 | 58.63396223                 | 46                             | 0.100102412                      | 0.103580734     | 0.065858 | 0.12277191 |
| 28.00659 | 0.380498 | 60.36066133                 | 39                             | 0.015674346                      | -0.038208778    | 0.060577 | 0.53198043 |
| 30.10652 | 0.416781 | 31.15657834                 | 39                             | 0.81025814                       | -0.011548698    | 0.054989 | 0.83477664 |
| 26.46384 | 0.185055 | 26.49392514                 | 21                             | 0.188238276                      | 0.13341796      | 0.089352 | 0.15100237 |
| 48.17326 | 1.524417 | 87.45719469                 | 97                             | 0.745595873                      | -0.011899451    | 0.028119 | 0.67310612 |
| 38.98047 | 0.373351 | 30.54338623                 | 28                             | 0.337724793                      | 0.008758851     | 0.061897 | 0.88851939 |
| 23.66951 | 0.276417 | 54.05257418                 | 35                             | 0.020845229                      | -0.069642949    | 0.064104 | 0.28494045 |

| outliers                                       | global_test_p |
|------------------------------------------------|---------------|
| rs115625939, rs12210947, rs1632969, rs33964890 | <0.001        |
| NA                                             | 0.021         |
| NA                                             | 0.828         |
| NA                                             | 0.197         |
| NA                                             | 0.769         |
| NA                                             | 0.393         |
| rs2596464                                      | 0.001         |

Notes: MR-Egger intercept  $P > 0.05$  indicates no evidence of directional pleiotropy. Cochran's Q test  $P > 0.05$  indicates no heterogeneity. Outlier SNPs listed were identified by MR-PRESSO global test; NA indicates no outlier detected. The global test  $P$  value  $< 0.05$  suggests presence of horizontal pleiotropy. After removal of outlier SNPs, the results were re-analysed (see Supplementary Table 2).

**Supplementary Table 2. Sensitivity analyses after outlier removal for exposures with detected horizontal pleiotropy.**

| id.exposure | id.outcome | outcome  | exposure                                    | nsnp | b_MR.Egger   | se_MR.Egger | pval_MR.Egger | estimate_MR.Egger | b_Weighted.median |
|-------------|------------|----------|---------------------------------------------|------|--------------|-------------|---------------|-------------------|-------------------|
| 0H9hzq      | svPv15     | VITILIGO | TD CD4 <sup>+</sup> %T cell                 | 47   | -1.038017246 | 0.387606153 | 0.010301714   | 0.35 (0.17-0.76)  | -0.534326046      |
| YJn39C      | mwEwel     | VITILIGO | CD4 on HLA DR <sup>+</sup> CD4 <sup>+</sup> | 36   | -0.074309395 | 0.355444155 | 0.83564841    | 0.93 (0.46-1.86)  | -0.274946285      |

| se_Weighted.median | pval_Weighted.median | estimate_Weighted.median | b_Inverse.variance.weighted. | se_Inverse.variance.weighted. |
|--------------------|----------------------|--------------------------|------------------------------|-------------------------------|
| 0.176922265        | 0.002526766          | 0.59 (0.41-0.83)         | -0.458049508                 | 0.107458913                   |
| 0.169839873        | 0.105478265          | 0.76 (0.54-1.06)         | -0.431029814                 | 0.136468104                   |

| pval_Inverse.variance.weighted. | fdr_Inverse.variance.weighted. | estimate_Inverse.variance.weighted. | b_Weighted.mode | se_Weighted.mode |
|---------------------------------|--------------------------------|-------------------------------------|-----------------|------------------|
| 2.02E-05                        | 4.04E-05                       | 0.63 (0.51-0.78)                    | -0.603246029    | 0.250095511      |
| 0.00158602                      | 0.00158602                     | 0.65 (0.50-0.85)                    | -0.259235128    | 0.252926108      |

| pval_Weighted.mode | estimate_Weighted.mode | b_Simple.mode | se_Simple.mode | pval_Simple.mode | estimate_Simple.mode | correct_causal_direction |
|--------------------|------------------------|---------------|----------------|------------------|----------------------|--------------------------|
| 0.019909247        | 0.55 (0.34-0.89)       | -0.529448328  | 0.367976302    | 0.156974005      | 0.59 (0.29-1.21)     | TRUE                     |
| 0.312421609        | 0.77 (0.47-1.27)       | -0.289743777  | 0.333428976    | 0.390777147      | 0.75 (0.39-1.44)     | TRUE                     |

| steiger_pval | Value_Power | F        | R2       | Q_Inverse.variance.weighted | Q_df_Inverse.variance.weighted | Q_pval_Inverse.variance.weighted |
|--------------|-------------|----------|----------|-----------------------------|--------------------------------|----------------------------------|
| 0            | 233766.9834 | 27.75605 | 0.377305 | 58.63396223                 | 46                             | 0.100102412                      |
| 4.14E-217    | 147381.0795 | 23.66951 | 0.276417 | 54.05257418                 | 35                             | 0.020845229                      |

| egger_intercept | se       | pval     | outliers | global_test_p |
|-----------------|----------|----------|----------|---------------|
| 0.103580734     | 0.065858 | 0.122772 | NA       | 0.089         |
| -0.069642949    | 0.064104 | 0.28494  | NA       | 0.027         |

Notes: Outlier SNPs (rs115625939, rs12210947, rs1632969, rs33964890 for TD CD4<sup>+</sup> %T cell; rs2596464 for CD4 on HLA DR<sup>+</sup> CD4<sup>+</sup>) were removed from the instrumental variables. After removal, the MR-PRESSO global test for TD CD4<sup>+</sup> %T cell was no longer significant ( $P=0.089$ ), indicating absence of residual horizontal pleiotropy. For CD4 on HLA DR<sup>+</sup> CD4<sup>+</sup>, residual pleiotropy remained (global test  $P=0.027$ ); therefore, this suggestive association should be interpreted cautiously.
